# Supplementary material
Source: publisher figshare collection journal article supplement (https://sage.figshare.com/ndownloader/files/16769984)

**Supplementary Figure 1.** Maternal (mean) serum vedolizumab concentration-vs-time curves with 10 mg/kg (A) and 100 mg/kg (B) dosing.

<sup>a</sup> Data shown are representative kinetic curves from 2 doses; vedolizumab concentrations were not measured in the intervening periods.

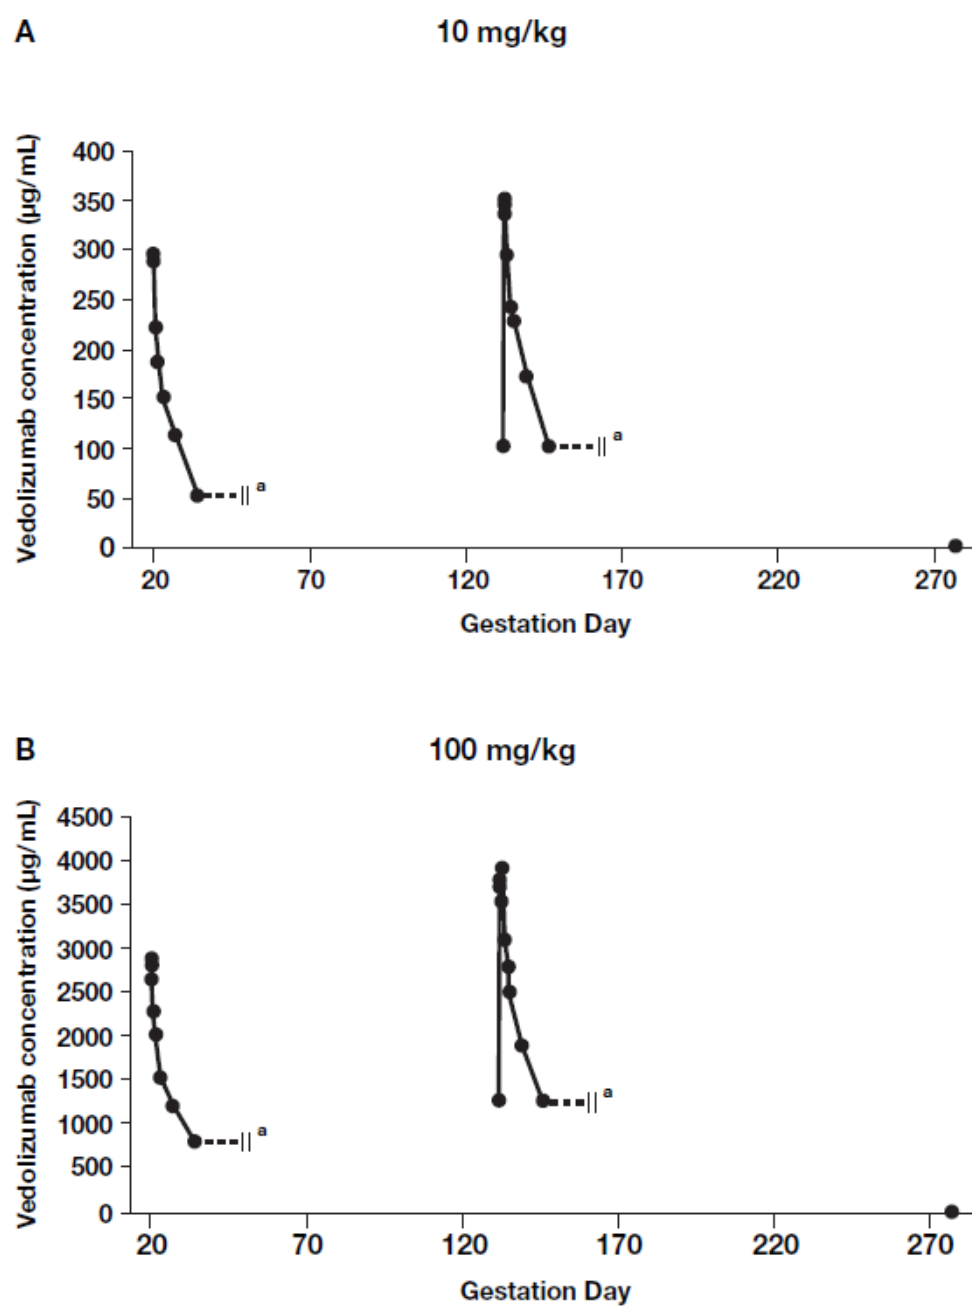

Supplement: Supplementary file 1 [file 16769984]
